# Supplementary material for: Small RNA expression from viruses, bacteria and human miRNAs in colon cancer tissue and its association with microsatellite instability and tumor location
Source: PubMed Central journal article supplement (PMC6381638; doi:10.1186/s12885-019-5330-0), 2019-02-20
Supplement: 12885_2019_5330_MOESM3_ESM.pdf [file 12885_2019_5330_MOESM3_ESM.pdf]

A

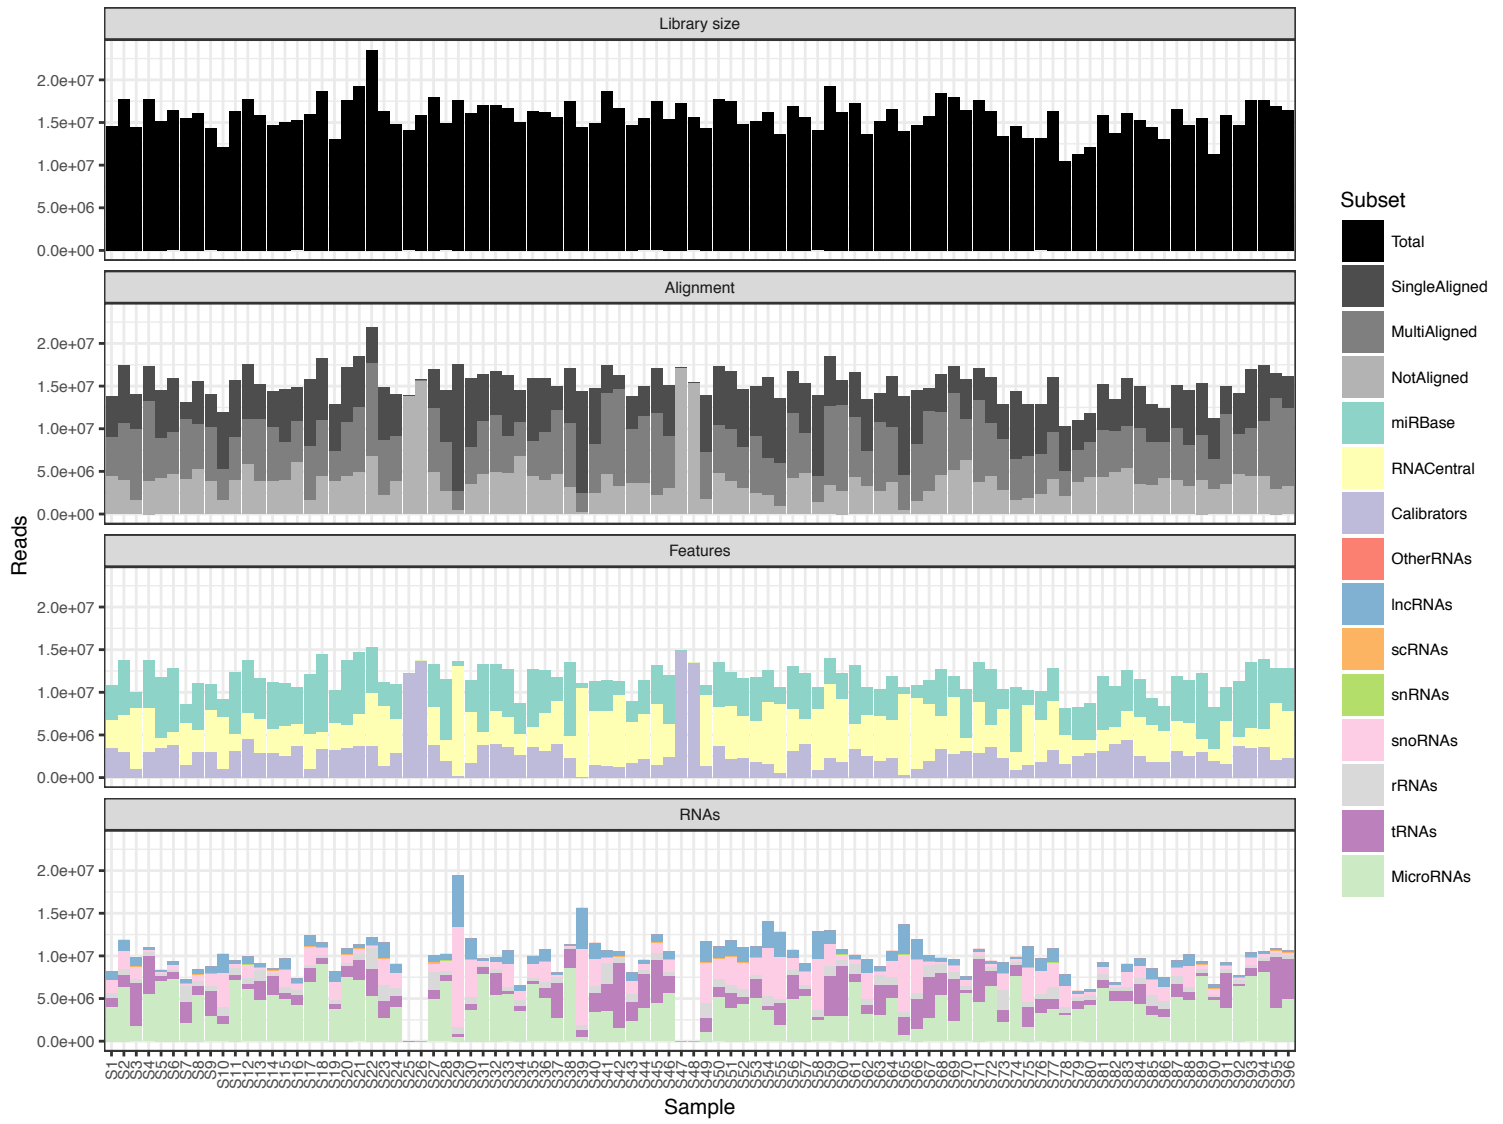

B

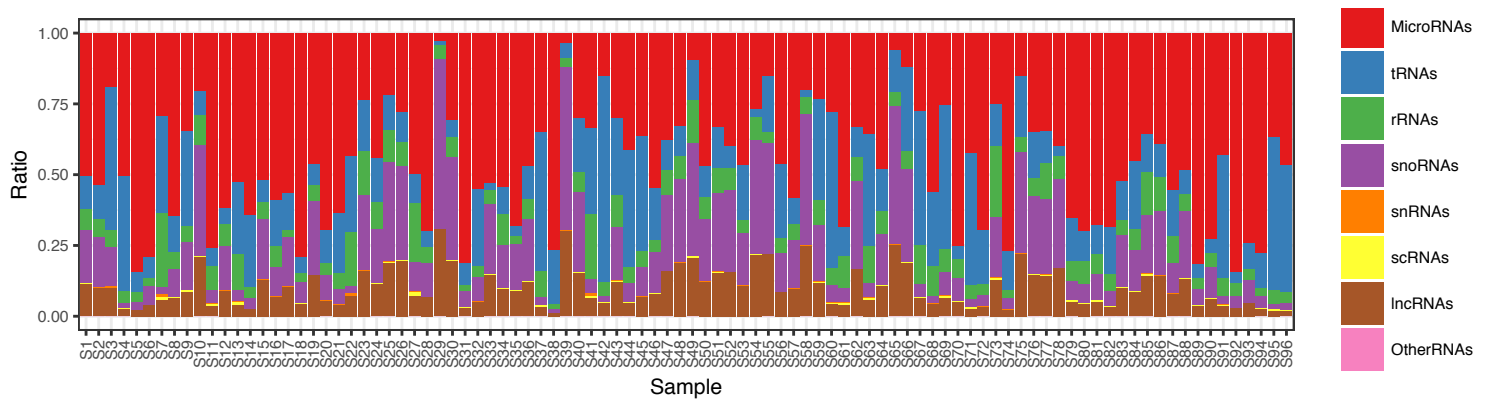

C

| Calibrator ID | Sequence                |
|---------------|-------------------------|
| Cal01         | GTCCCACTCCGTAGATCTGTTC  |
| Cal02         | GATGTAACGAGTTGGAATGCAA  |
| Cal03         | TAGCATATCGAGCCTGAGAACA  |
| Cal04         | CATCGGTCGAACTTATGTGAAA  |
| Cal05         | GAAGCACATTCGCACATCATAT  |
| Cal06         | TCTTAACCCGGACCAGAAACTA  |
| Cal07         | AGGTTCCGGATAAGTAAGAGCC  |
| Cal08         | TAATCTCCTTAAGCGAATCTCGC |
| Cal09         | AAAGTAGCATCCGAAATACGGA  |
| Cal10         | TGATACGGATGTTATACGACG   |
