# Supplementary material for: Small RNA expression from viruses, bacteria and human miRNAs in colon cancer tissue and its association with microsatellite instability and tumor location
Source: PubMed Central journal article supplement (PMC6381638; doi:10.1186/s12885-019-5330-0), 2019-02-20

A

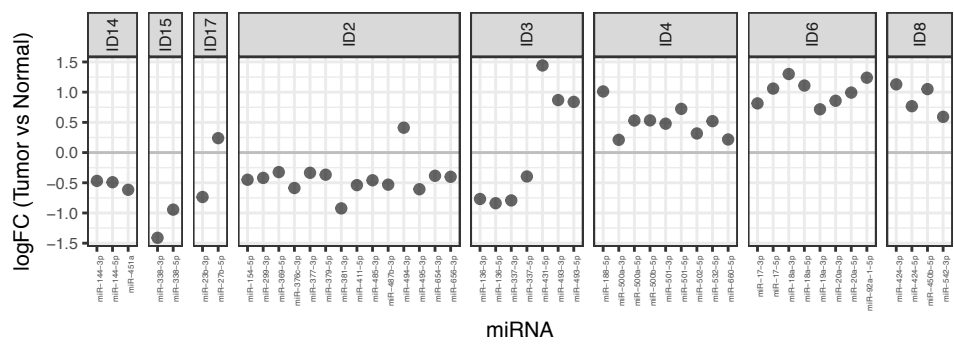

B

3' non-templated addition TACCCTGTAGAACC GAATTTGTGT A

3' tailing TACCCTGTAGAACC GAATTTGTGT G

3' trimming TACCCTGTAGAACC GAATTTGT G

5' tailing ATACCCTGTAGAACC GAATTTGT GT

5' trimming ACCCTGTAGAACC GAATTTGT GT

canonical hsa-miR-10b-5p TACCCTGTAGAACC GAATTTGT GT

precursor hsa-miR-10b-5p TATATACCCTGTAGAACC GAATTTGTGTGGTATCCGTATAGT CACAGATTCTAGGGGAATATA

C

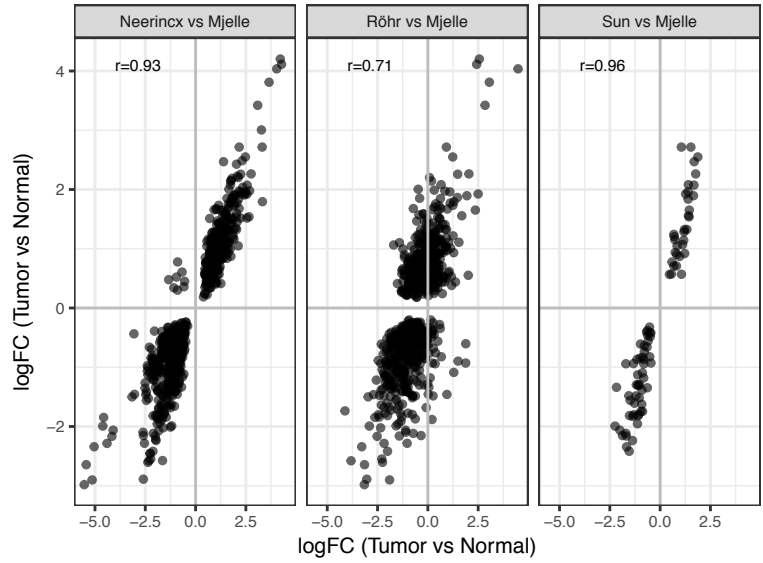

Supplement: 12885_2019_5330_MOESM4_ESM.pdf [file 12885_2019_5330_MOESM4_ESM.pdf]
