# Supplementary material for: Small RNA expression from viruses, bacteria and human miRNAs in colon cancer tissue and its association with microsatellite instability and tumor location
Source: PubMed Central journal article supplement (PMC6381638; doi:10.1186/s12885-019-5330-0), 2019-02-20

**A**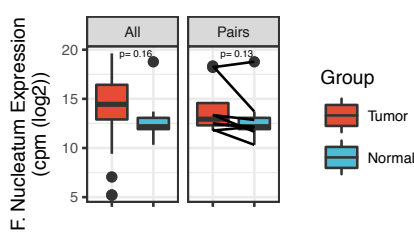**B**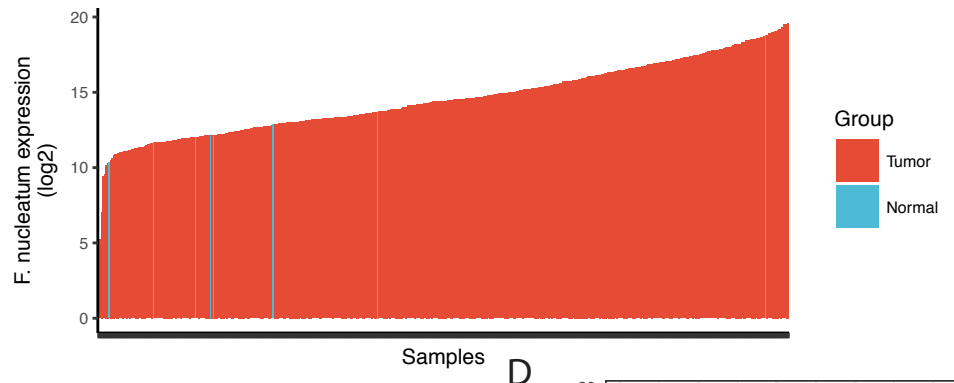**C**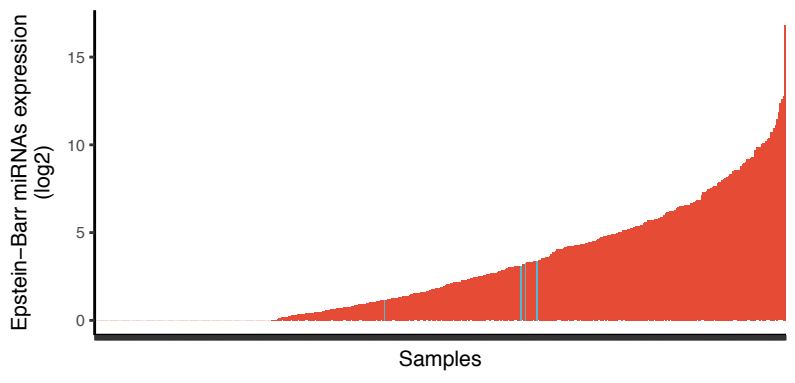**D**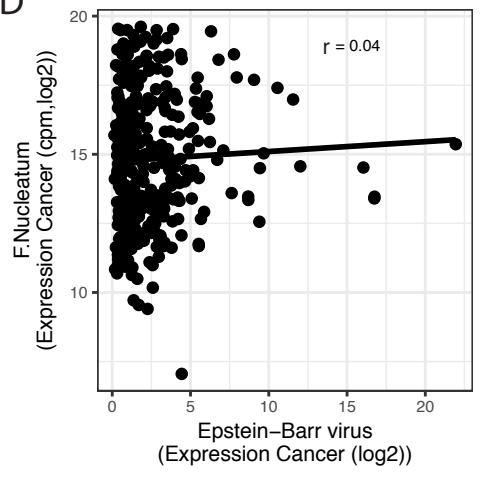**E**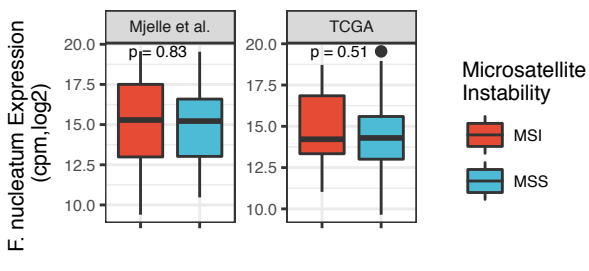**F**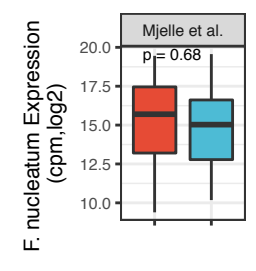**G**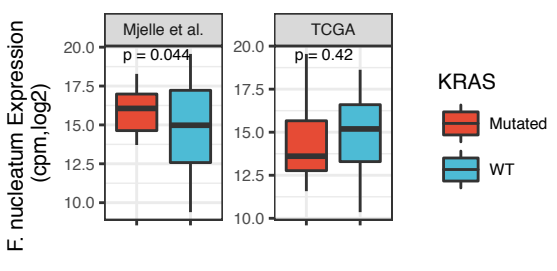**H**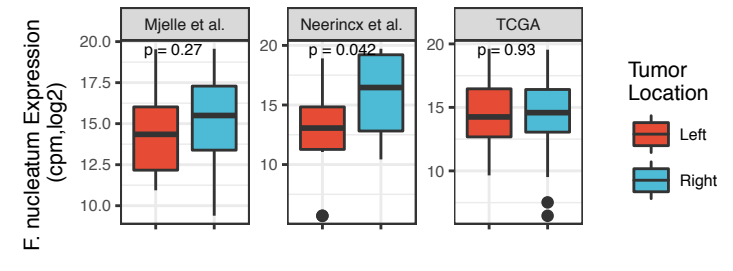**I**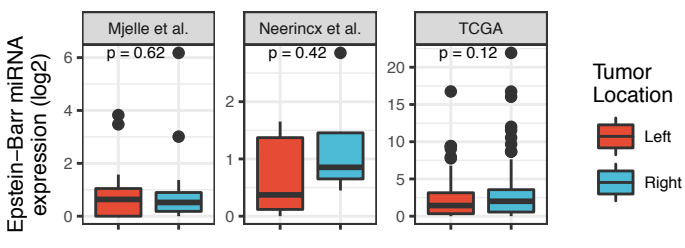**J**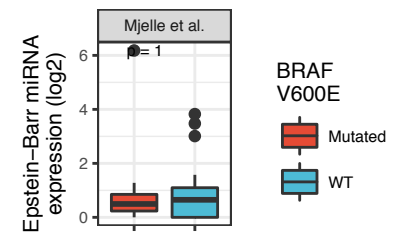**K**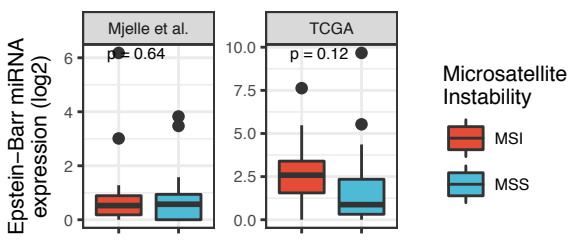**L**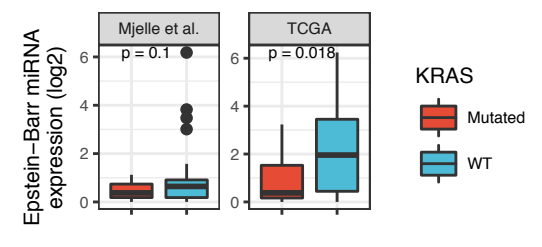

Supplement: 12885_2019_5330_MOESM7_ESM.pdf [file 12885_2019_5330_MOESM7_ESM.pdf]
